# Supplementary material for: Nanostructured Layer of Silver for Detection of Small Biomolecules in Surface-Assisted Laser Desorption Ionization Mass Spectrometry
Source: MDPI journal article supplement (doi:10.3390/ma15124076), 2022-06-08
Supplement: s1 [file s1]

*Supplementary materials* for the paper entitled  
**‘Nanostructured Layer of Silver for Detection of Small  
 Biomolecules in Surface-Assisted Laser Desorption Ionization Mass Spectrometry’**

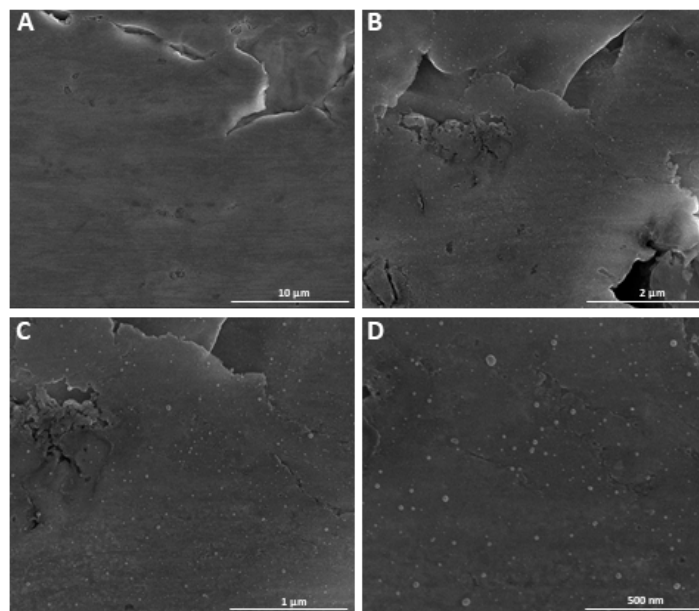

**Figure S1.** SEM figures of positive electrode (stainless-steel plate) at different magnification values: A – 10,000x; B – 50,000x; C – 100,000x; D – 200,000x

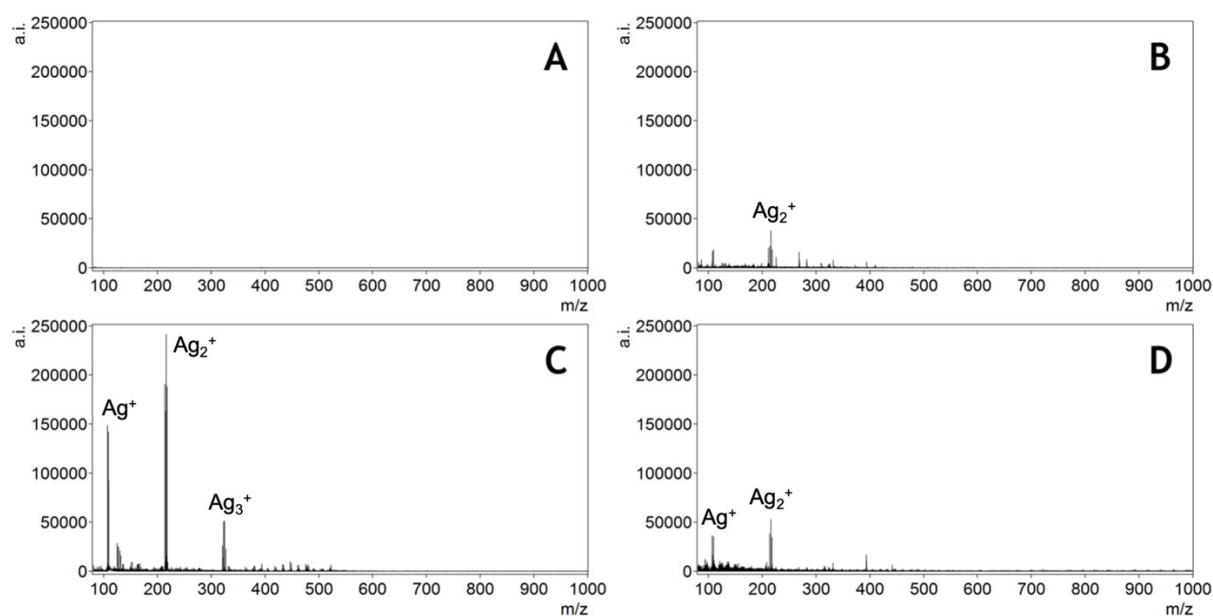

**Figure S2.** Mass spectra of A – pure steel plate; B – steel plate immersed into AgTFA solution for 15 min; C – negative electrode after electrodeposition from AgTFA (10 V, 15 min) ; D – positive electrode after electrodeposition from AgTFA (10 V, 15 min)

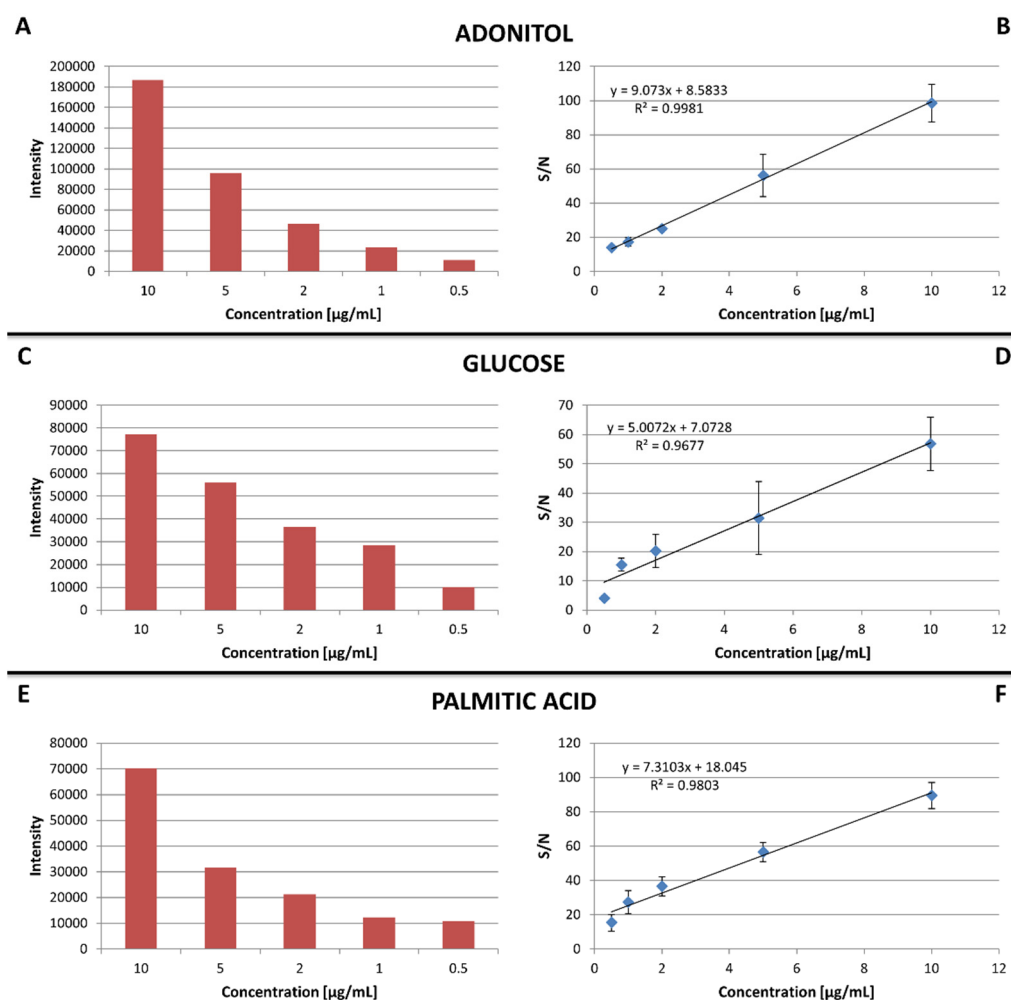

**Figure S3.** Intensity of  $[\text{M}+^{107}\text{Ag}]^+$  adduct in different concentration (A, C, E) and linear regression equations based on the signal-to-noise (S/N) ratio (B, D, F) for adonitol, glucose and palmitic acid using silver nanostructured layer
